# Supplementary material for: Hierarchical self-assembly and secondary structures of linear polypeptides graft onto POSS in the side chain through click chemistry
Source: Royal Society of Chemistry journal article supplement (doi:10.1039/c1py00381j), 2011-11-16
Supplement: c1py00381j.pdf [file c1py00381j.pdf]

## Supporting Information

### Hierarchical Self-Assembly and Secondary Structures of Linear Polypeptides Graft onto POSS in the Side Chain through Click Chemistry

Yung-Chih Lin and Shiao-Wei Kuo\*

Department of Materials and Optoelectronic Science, Center for Nanoscience and Nanotechnology, National Sun Yat-Sen University, Kaohsiung, 804, Taiwan.

Correspondence to: Shiao-Wei Kuo (Email: [kuosw@faculty.nsysu.edu.tw](mailto:kuosw@faculty.nsysu.edu.tw))

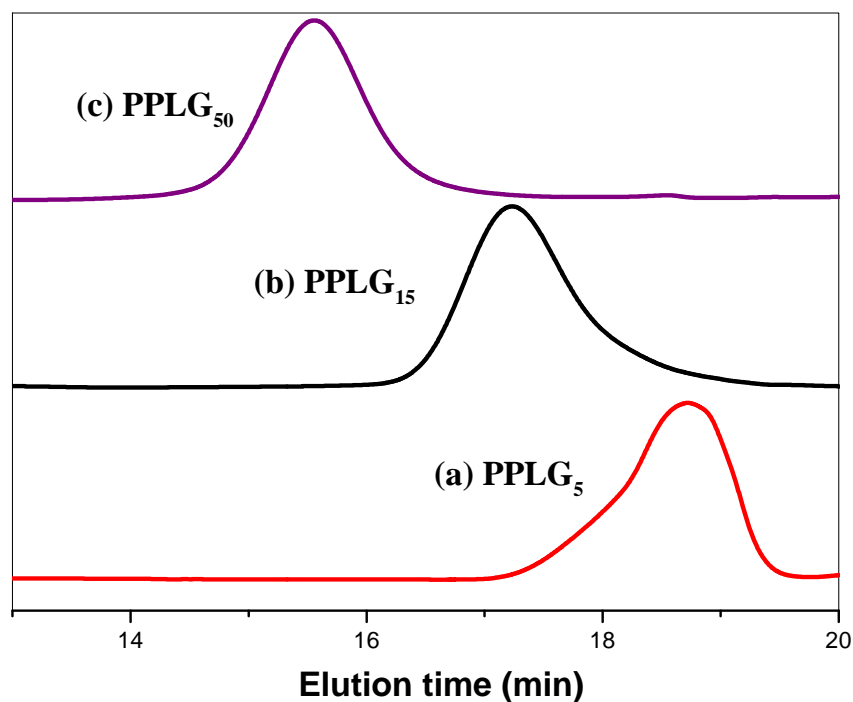

**Figure S1:** GPC traces of (a), PPLG<sub>5</sub>, (b) PPLG<sub>15</sub>, (c) PPLG<sub>50</sub>

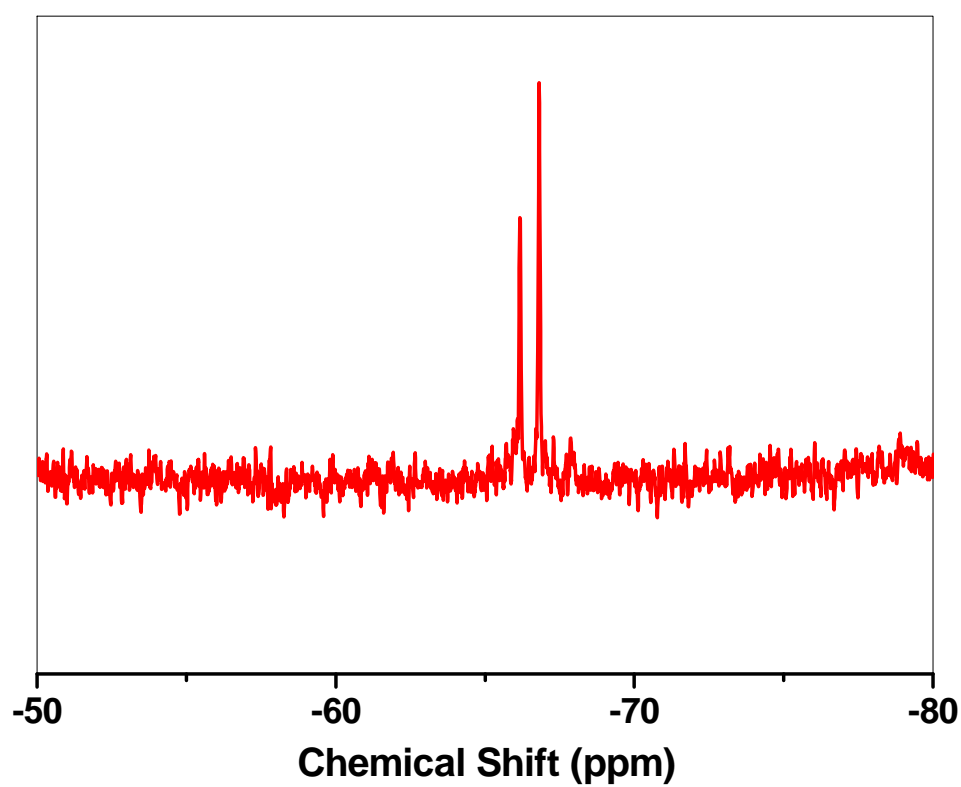

**Figure S2:**  $^{29}\text{Si}$  NMR spectra of (a) PPLG<sub>5</sub>-g-POSS.

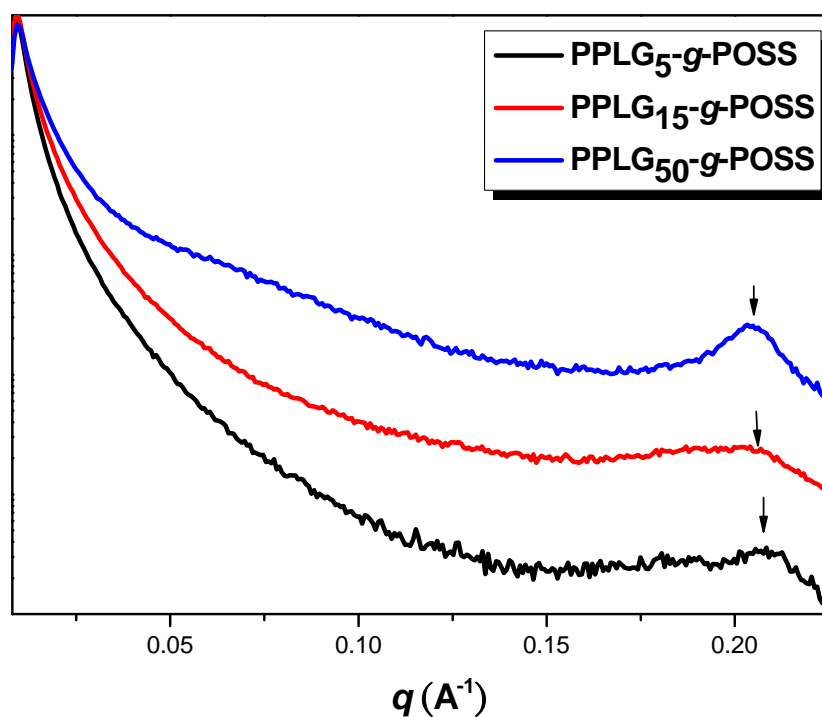

**Figure S3:** SAXS patterns (recorded at 393 K) of PPLG-*g*-POSS species incorporating different degrees of polymerization.
